# Supplementary material for: Assessing genomic diversity and signatures of selection in Original Braunvieh cattle using whole-genome sequencing data
Source: bioRxiv or medRxiv preprint supplement (doi:10.1101/703439), 2019-11-29

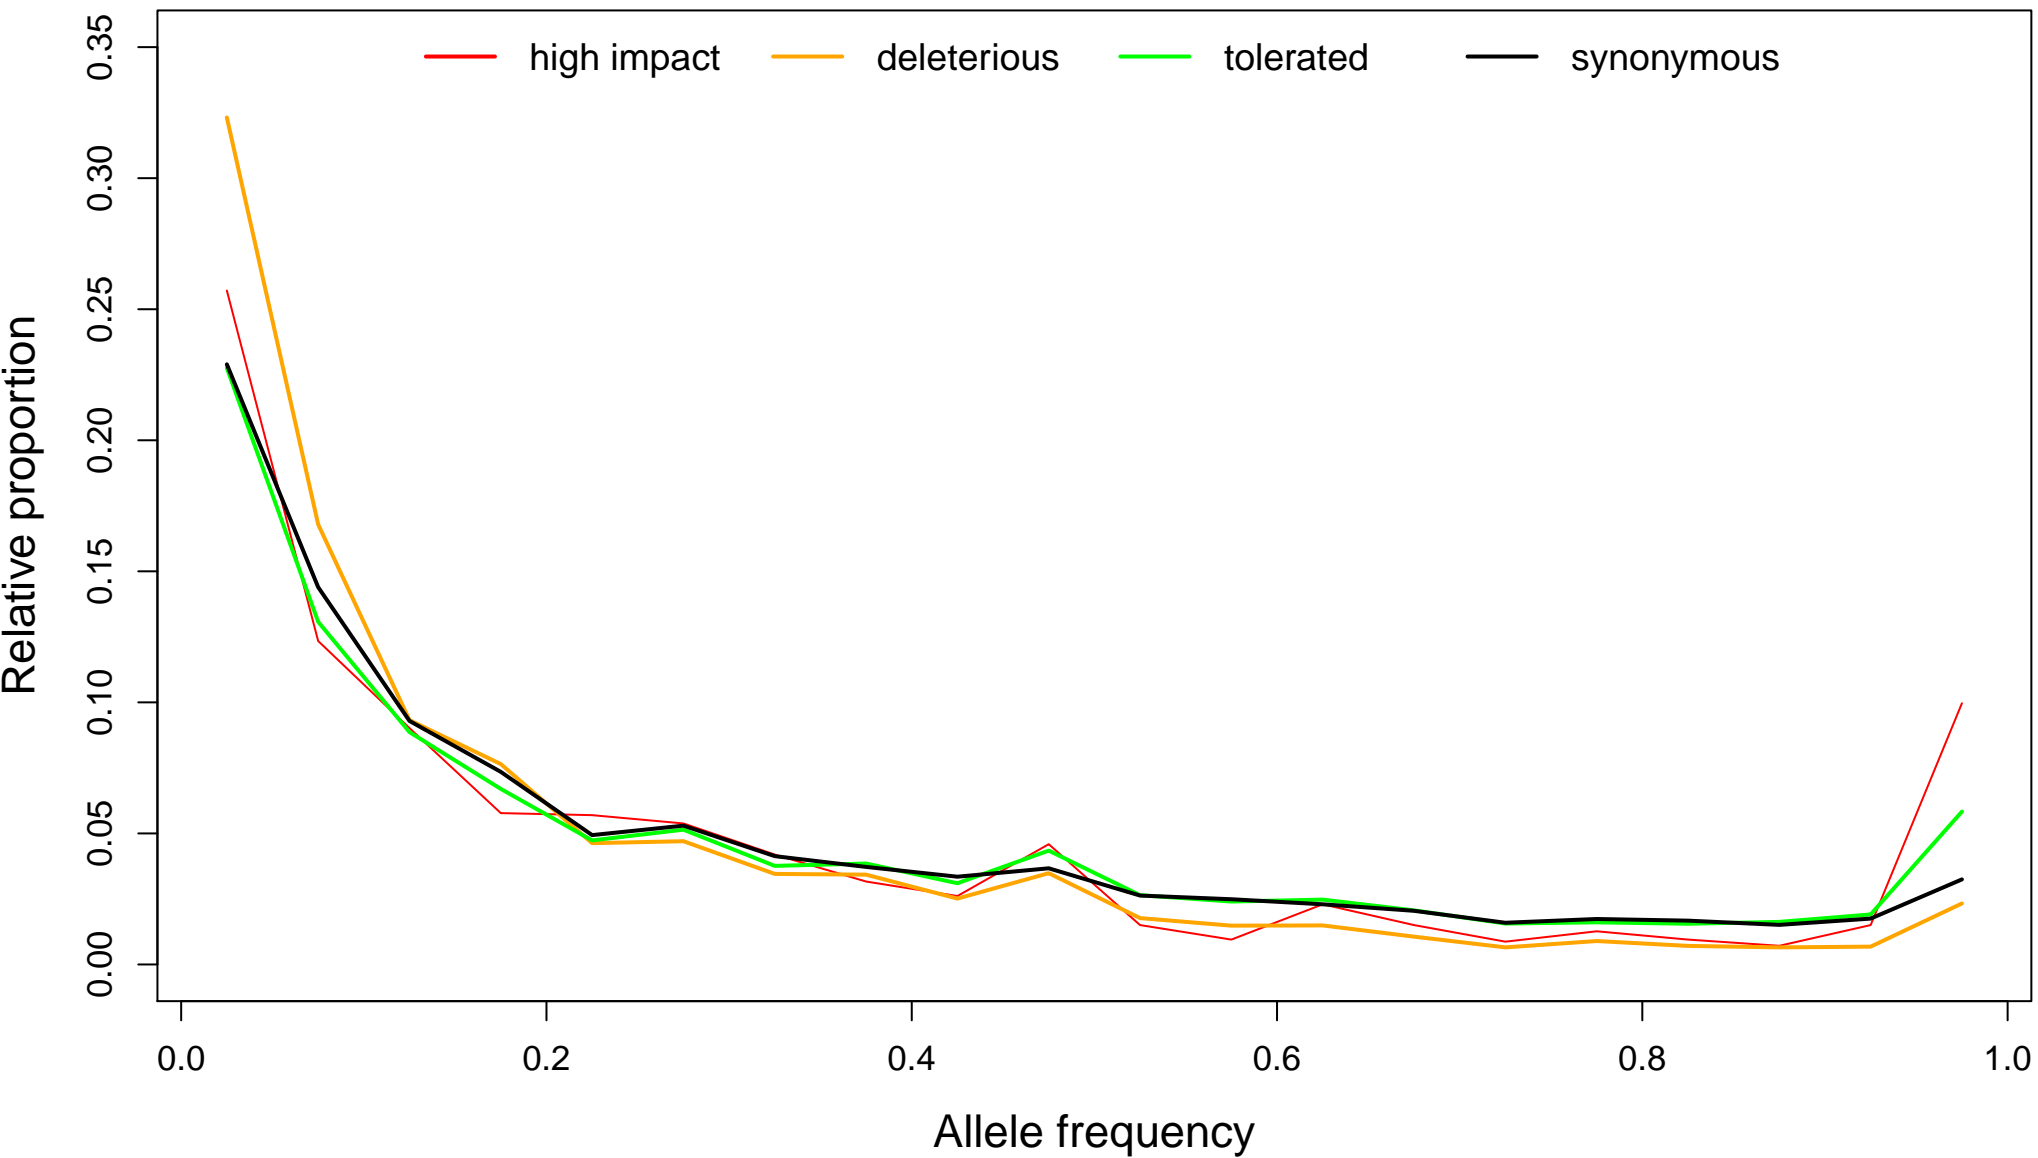

Supplement: Supplementary file [file media-4.pdf]
