# Supplementary material for: Assessing genomic diversity and signatures of selection in Original Braunvieh cattle using whole-genome sequencing data
Source: bioRxiv or medRxiv preprint supplement (doi:10.1101/703439), 2019-11-29

Genomic inbreeding

0.12 0.14 0.16 0.18

1960–1989

1990–2012

Birth Year

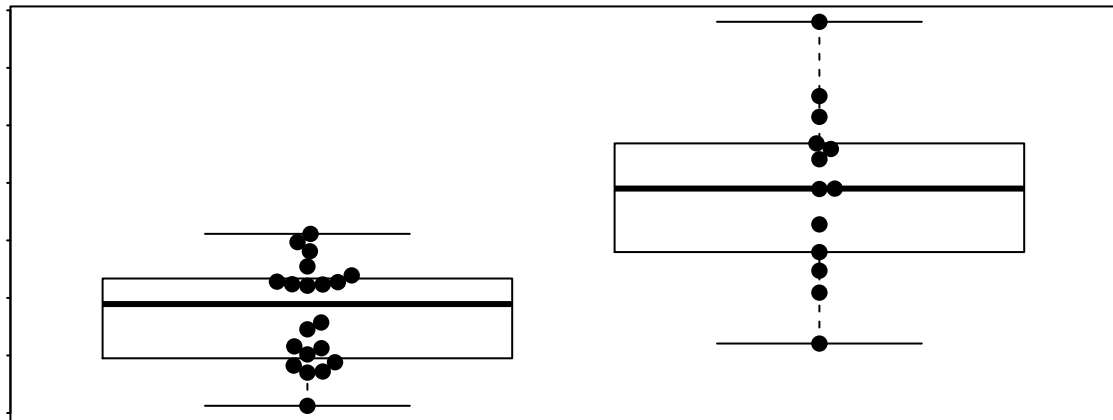

Supplement: Supplementary file [file media-8.pdf]
